# Supplementary material
Source: MDPI journal article supplement (https://www.mdpi.com/2311-5629/9/4/105)
Supplement: s1 [file s1]

# Exploring the Impact of DAHP Impregnation on Activated Carbon Fibers for Efficient Charge Storage and Selective O<sub>2</sub> Reduction to Peroxide

Nemanja Gavrilov,<sup>1</sup> Stefan Breitenbach<sup>2,3</sup>, Christoph Unterweger<sup>2</sup>, Christian Fürst<sup>2</sup>, Igor A. Pašti<sup>1\*</sup>

<sup>1</sup>*University of Belgrade – Faculty of Physical Chemistry, Studentski trg 12-16, 11158 Belgrade, Serbia;*

<sup>2</sup>*Wood K plus –Kompetenzzentrum Holz GmbH, Altenberger Strasse 69, 4040 Linz, Austria;*

<sup>3</sup>*Institute of Chemical Technology of Inorganic Materials (TIM), Johannes Kepler University Linz, Altenberger Strasse 69, 4040 Linz, Austria*

\*Corresponding author: [igor@ffh.bg.ac.rs](mailto:igor@ffh.bg.ac.rs); University of Belgrade – Faculty of Physical Chemistry, Studentski trg 12-16, 11158 Belgrade, Serbia

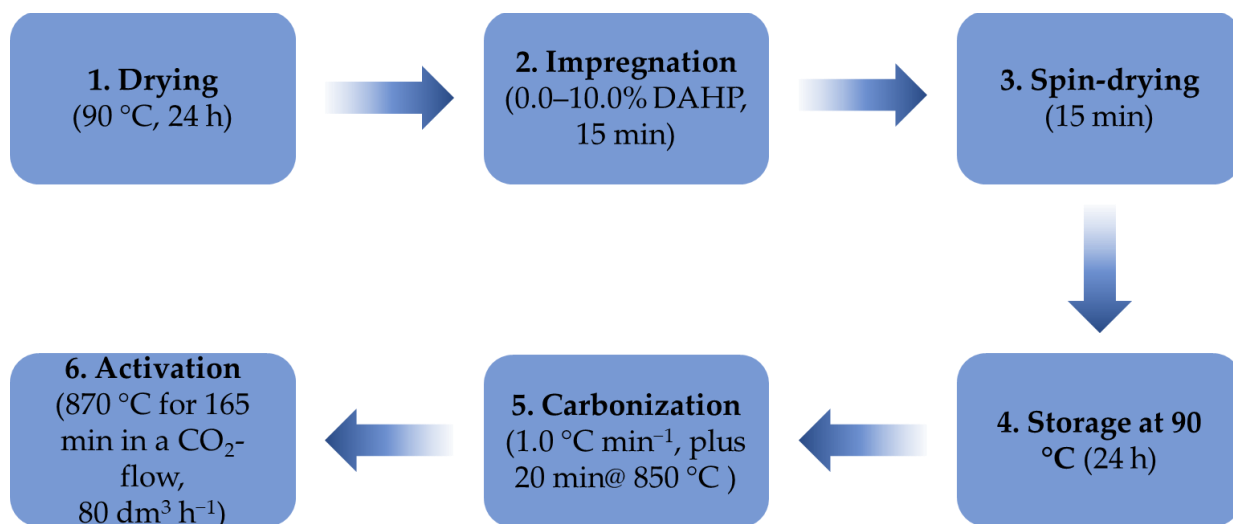

**Scheme S1.** The block synthesis workflow for the DAHP-X samples.

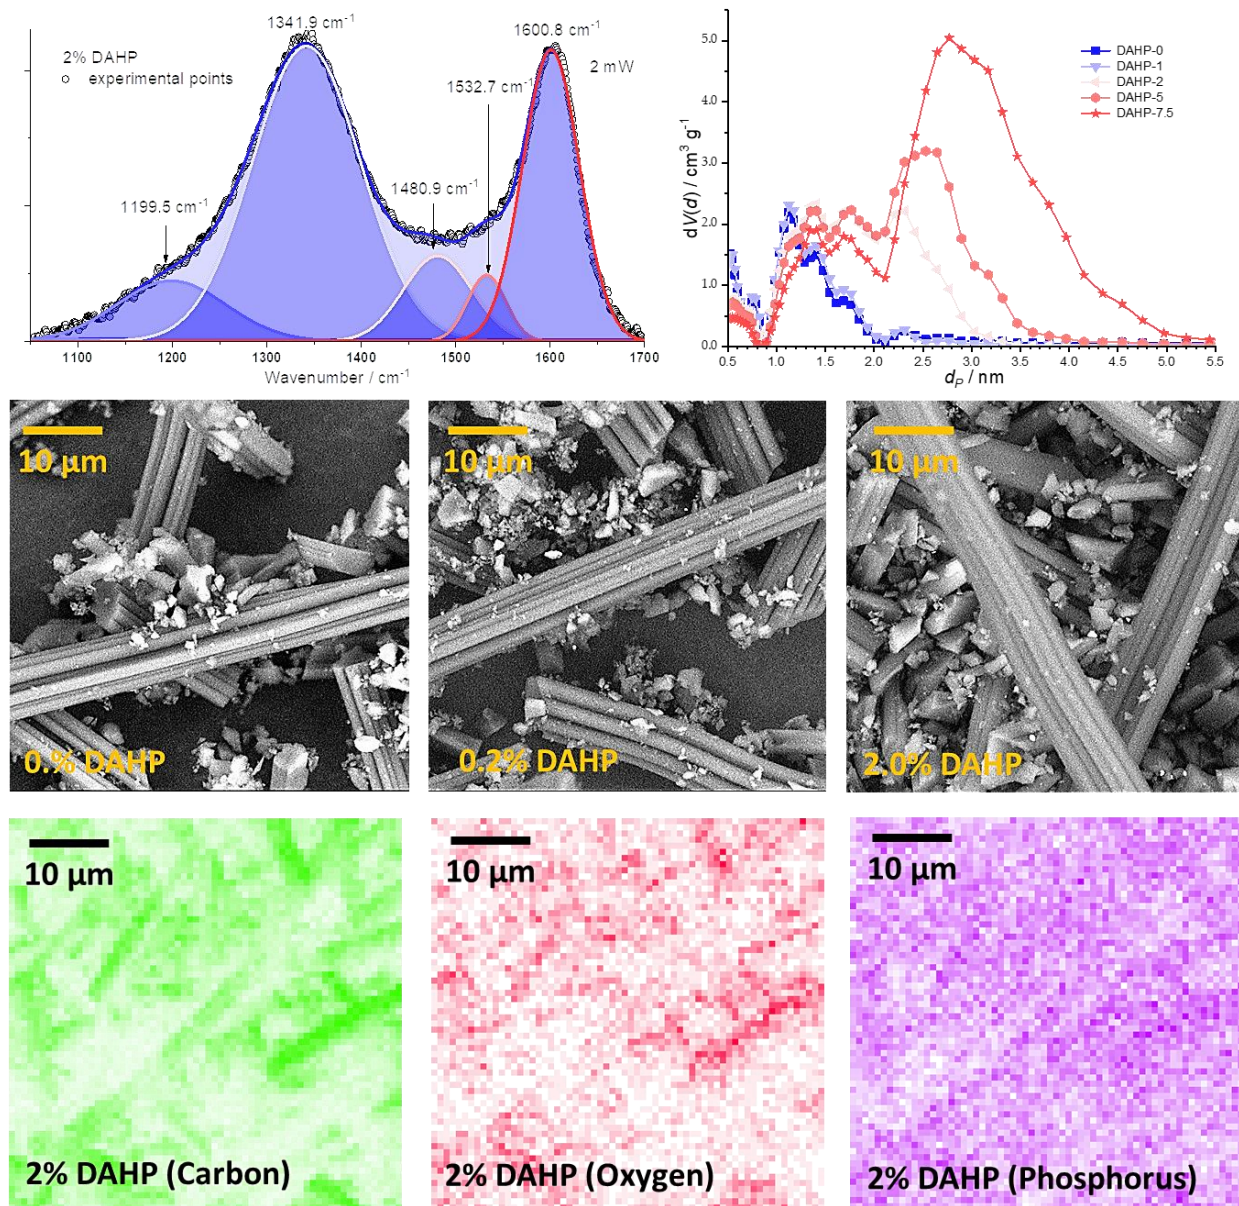

**Figure S1.** The representative results of the physical and chemical characterization of the studied samples: top row – Raman spectrum and Pore Size Distribution for selected samples, middle row – Scanning Electron Microscopy Analysis, bottom row – EDX mapping for the sample 2% DAHP.

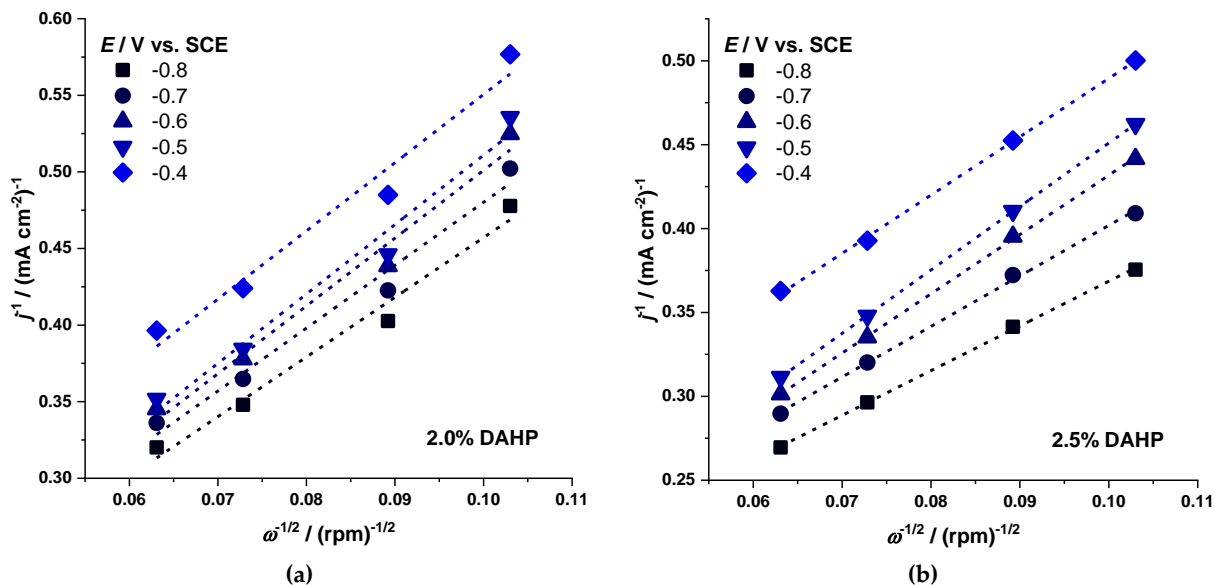

**Figure S2.** Representative Koutecky-Levich plots of studied ACF samples: (a) sample 2.0% DAHP, (b) sample 2.5% DAHP.

**Table S1.** Measured capacitances (F g<sup>-1</sup>) in H<sub>2</sub>SO<sub>4</sub> solution at different scan rates

| <b>material</b>    | <b>5 mV s<sup>-1</sup></b> | <b>10 mV s<sup>-1</sup></b> | <b>20 mV s<sup>-1</sup></b> | <b>50 mV s<sup>-1</sup></b> | <b>100 mV s<sup>-1</sup></b> | <b>200 mV s<sup>-1</sup></b> | <b>400 mV s<sup>-1</sup></b> |
|--------------------|----------------------------|-----------------------------|-----------------------------|-----------------------------|------------------------------|------------------------------|------------------------------|
| <b>0.0 % DAHP</b>  | 48.9±3.9                   | 51.0±4.6                    | 57.5±5.2                    | 60.0±4.2                    | 53.3±3.7                     | 50.8±2.5                     | 46.3±4.2                     |
| <b>0.25 % DAHP</b> | 61.9±5.6                   | 60.2±3.6                    | 59.8±4.8                    | 56.7±3.4                    | 48.2±2.9                     | 42.7±3.0                     | 36.1±2.5                     |
| <b>0.5 % DAHP</b>  | 44.3±2.2                   | 44.6±4.0                    | 47.5±2.4                    | 49.0±3.4                    | 42.1±1.7                     | 39.9±2.0                     | 36.4±1.5                     |
| <b>1.0 % DAHP</b>  | 102±5                      | 107.6±6.5                   | 110±6.6                     | 119.9±8.4                   | 113.7±9.1                    | 96.6±3.9                     | 78.6±4.7                     |
| <b>1.5 % DAHP</b>  | 67.3±6.1                   | 74.2±5.9                    | 91.1±3.6                    | 97.7±7.8                    | 90.6±5.4                     | 87.8±6.1                     | 82.4±4.9                     |
| <b>2.0 % DAHP</b>  | 47.1±3.3                   | 59.6±4.8                    | 84±5.9                      | 101.3±7.1                   | 93.6±5.6                     | 95±8.5                       | 92.0±4.6                     |
| <b>2.5 % DAHP</b>  | 88.6±7.1                   | 97.5±3.9                    | 112.6±5.6                   | 118±6                       | 110.1±8.8                    | 106±4.3                      | 98.7±7.9                     |
| <b>5.0 % DAHP</b>  | 47.1±2.4                   | 56.3±3.4                    | 73.2±5.1                    | 84.2±4.2                    | 77.2±3.1                     | 77.9±4.7                     | 74.6±6.0                     |
| <b>7.5 % DAHP</b>  | 39.9±3.6                   | 38.0±2.7                    | 47.2±2.4                    | 56.7±5.1                    | 51.6±4.1                     | 52.2±3.7                     | 50.3±3.5                     |
| <b>10.0 % DAHP</b> | 97.6±3.9                   | 91.0±8.2                    | 87.2±3.5                    | 85.3±4.3                    | 72.8±2.9                     | 69.5±2.8                     | 64.4±2.6                     |

**Table S2.** Measured capacitances (F g<sup>-1</sup>) in KNO<sub>3</sub> solution at different scan rates

| material    | 5 mV s <sup>-1</sup> | 10 mV s <sup>-1</sup> | 20 mV s <sup>-1</sup> | 50 mV s <sup>-1</sup> | 100 mV s <sup>-1</sup> | 200 mV s <sup>-1</sup> | 400 mV s <sup>-1</sup> |
|-------------|----------------------|-----------------------|-----------------------|-----------------------|------------------------|------------------------|------------------------|
| 0.0 % DAHP  | 84.0±2.5             | 72.9±2.9              | 66.4±6.0              | 58.6±3.5              | 49.3±3.9               | 43.7±1.3               | 37.5±2.6               |
| 0.25 % DAHP | 49.9±2.5             | 49.9±4.5              | 51.2±3.1              | 49.6±1.5              | 43.4±3.5               | 38.1±3.0               | 31.5±1.3               |
| 0.5 % DAHP  | 30.6±2.8             | 30.5±1.5              | 35.5±2.5              | 39.8±2.4              | 35.7±2.9               | 34.7±2.8               | 32.1±2.6               |
| 1.0 % DAHP  | 128±5                | 116.5±3.5             | 119.0±6.0             | 117±3.5               | 104.6±5.2              | 98.8±4.0               | 90.7±5.4               |
| 1.5 % DAHP  | 98.3±4.9             | 77.5±3.9              | 79.9±4.8              | 84.3±5.9              | 79.4±6.4               | 77.0±3.1               | 72.1±2.9               |
| 2.0 % DAHP  | 36.1±2.2             | 54.1±1.6              | 76.9±5.4              | 88±2.6                | 84.6±6.8               | 82.7±7.4               | 83.3±5.0               |
| 2.5 % DAHP  | 52.9±4.8             | 77.8±7.0              | 95.8±8.6              | 102.0±6.1             | 96.9±8                 | 95±5.7                 | 89.2±4.5               |
| 5.0 % DAHP  | 33.5±2.3             | 42.7±2.6              | 60.6±3.0              | 72.4±2.2              | 68.0±4.8               | 70.0±2.1               | 68.7±4.8               |
| 7.5 % DAHP  | 56.4±3.9             | 36.5±2.6              | 36.1±2.9              | 44.6±1.8              | 41.2±2.5               | 42.6±3.0               | 42.2±2.1               |
| 10.0 % DAHP | 84.0±7.6             | 36.7±2.6              | 46.8±4.2              | 56.7±2.3              | 51.7±4.7               | 53.3±2.1               | 52.2±1.6               |

**Table S3.** Calculated ORR mass activities (in A g<sup>-1</sup>)

| material    | <i>E vs. SCE / V</i> |          |          |          |
|-------------|----------------------|----------|----------|----------|
|             | -0.8                 | -0.7     | -0.6     | -0.5     |
| 0.0 % DAHP  | 34.1±3.4             | 37.6±3.0 | 42.2±3.4 | 45.1±4.1 |
| 0.25 % DAHP | 19.3±1.5             | 17.6±1.8 | 18.2±1.5 | 15.3±1.5 |
| 0.5 % DAHP  | 22.2±2.0             | 19.0±1.7 | 20.6±1.9 | 22.8±2.3 |
| 1.0 % DAHP  | 43.5±4.2             | 44.9±3.6 | 51.7±4.7 | 55.3±4.4 |
| 1.5 % DAHP  | 25.7±2.1             | 23.6±1.9 | 23.5±2.1 | 22.2±2.2 |
| 2.0 % DAHP  | 59.2±5.3             | 57.5±4.6 | 68.3±6.1 | 68.9±6.9 |
| 2.5 % DAHP  | 39.1±3.9             | 39.7±3.6 | 50.9±4.1 | 54.9±5.5 |
| 5.0 % DAHP  | 12.7±1.1             | 12.0±1.2 | 13.5±1.1 | 15.3±1.4 |
| 7.5 % DAHP  | 39.8±3.6             | 38.7±3.1 | 60.2±6.0 | 88.5±8.9 |
| 10.0 % DAHP | 33.5±2.7             | 34.5±3.1 | 44.8±4.5 | 56.7±4.5 |

**Table S4.** Number of electrons consumed *per* O<sub>2</sub> molecule, calculated at different electrode potentials

| material           | <i>E vs. SCE / V</i> |         |         |         |
|--------------------|----------------------|---------|---------|---------|
|                    | −0.8                 | −0.7    | −0.6    | −0.5    |
| <b>0.0 % DAHP</b>  | 2.4±0.2              | 2.2±0.2 | 2.0±0.1 | 2.0±0.1 |
| <b>0.25 % DAHP</b> | 2.1±0.1              | 2.0±0.1 | 2.1±0.1 | 2.3±0.2 |
| <b>0.5 % DAHP</b>  | 2.6±0.1              | 2.6±0.1 | 2.5±0.2 | 2.3±0.1 |
| <b>1.0 % DAHP</b>  | 3±0.2                | 2.3±0.1 | 2.1±0.1 | 2.0±0.1 |
| <b>1.5 % DAHP</b>  | 2.6±0.1              | 2.5±0.1 | 2.3±0.2 | 2.3±0.1 |
| <b>2.0 % DAHP</b>  | 2.4±0.1              | 2.2±0.2 | 2.1±0.1 | 2.0±0.1 |
| <b>2.5 % DAHP</b>  | 3.4±0.2              | 3.1±0.2 | 2.6±0.2 | 2.4±0.1 |
| <b>5.0 % DAHP</b>  | 2.5±0.2              | 2.3±0.1 | 2.0±0.1 | 1.9±0.1 |
| <b>7.5 % DAHP</b>  | 2.9±0.2              | 2.7±0.1 | 2.2±0.1 | 1.9±0.1 |
| <b>10.0 % DAHP</b> | 3.2±0.2              | 2.8±0.2 | 2.3±0.1 | 2.1±0.1 |
